# Supplementary material for: TCP Transcription Factors Interact With NPR1 and Contribute Redundantly to Systemic Acquired Resistance
Source: Front Plant Sci. 2018 Aug 14;9:1153. doi: 10.3389/fpls.2018.01153 (PMC6102491; doi:10.3389/fpls.2018.01153)
Supplement: Supplementary file 1 [file Data_Sheet_1.docx]

Supplementary Materials

TCP Transcription Factors Interact with NPR1 and Contribute Redundantly to Systemic Acquired Resistance

Min Li1,2, Huan Chen1,2, Jian Chen1,2, Ming Chang1,2, Ian Palmer1, Walter Gassmann3, Fengquan Liu2,4*, and Zheng Qing Fu1*

1Department of Biological Sciences, University of South Carolina, Columbia, SC, United States,

2Institute of Plant Protection, Jiangsu Academy of Agricultural Sciences, Nanjing, China,

3Division of Plant Sciences, C.S. Bond Life Sciences Center and Interdisciplinary Plant Group, University of Missouri, Columbia, MO, United States,

4Jiangsu Key Laboratory for Food Quality and Safety-State Key Laboratory Cultivation Base of Ministry of Science and Technology, Nanjing, China

*** Correspondence:**Fengquan Liu
[fqliu20011@sina.com](mailto:fqliu20011@sina.com)Zheng Qing Fu
[zfu@mailbox.sc.edu](mailto:zfu@mailbox.sc.edu)

Keywords: plant immunity1, systemically acquired resistance2, transcriptional regulation3, NON-EXPRESSER OF PR GENES 14, TCP transcription factors5, *PATHOGENESIS-RELATED* genes6.

# Supplementary Tables

**Supplemental Table 1. Primers used in this study**

| Primer Name | Primer Sequence (5'-3') |
| --- | --- |
| GW_F (attB1) | ggggACAAGTTTGTACAAAAAAGCAGGCTTC |
| GW_R (attB2) | gggcACCACTTTGTACAAGAAAGCTGGGTC |
| TCP8_GW_F | GW_F_ATGGATCTCTCCGACATCCG |
| TCP8_GW_R | GW_R_TCACTCAGAGCTATTTGAGTTCTCCT |
| TCP14_GW_F | GW_F_ATGCAAAAGCCAACATCAAGTATC |
| TCP14_GW_R | GW_R_CTAATCTTGCTGATCCTCCTCATCA |
| TCP15_GW_F | GW_F_ATGGATCCGGATCCGGATC |
| TCP15_GW_R | GW_R_CTAGGAATGATGACTGGTGCTTCC |
| PR1_p2380_GW_F | GW_F_ACAAAGAATATATATAACGATCATTG |
| PR1_p2380_GW_R | GW_R_AAAAATCGAGAATAGCCAGT |
| PR2_p1513_GW_F | GW_F_GCCGAACCAATATTCTATCAAG |
| PR2_p1513_GW_R | GW_R_TTTCTTGATTTTTCTATGATTCTGTG |
| PR5_p1000_GW_F | GW_F_GGTTCAATTTATGAACCAGTTTCTAC |
| PR5_p500_GW_F | GW_F_CAACAGTCAACAAACACATCTATCTG |
| PR5_p_GW_R | GW_R_ATTTTTTTATGGGTTTTTTGTGTG |
| NPR1_p1000_GW_F | GW_F_CCAAGAGGTGATTATGCAGA |
| NPR1_p1000_GW_R | GW_R_CAACAGGTTCCGATGAATTG |
| PR5_a_F | CTGTTGTTACACACACACACACCC |
| PR5_a_R | CCCCCTAATGAAGCATTCATCT |
| PR5_b_F | TCAACTATGTTCTAGACTTCTAGAAGCC |
| PR5_b_R | CTAAACAGGTATAAAATCTGGTTATAAACG |
| PR5_c_F | GGATCTCATAGTCGCGGATCA |
| PR5_c_R | CATGGCTGATGCACACTACACT |
| PR5_p1000_m_F | AACCCCCAGACAATAATATTTTATCGGTCA |
| PR5_p1000_m_R | TGACCGATAAAATATTATTGTCTGGGGGTT |

# Supplementary Figures

##
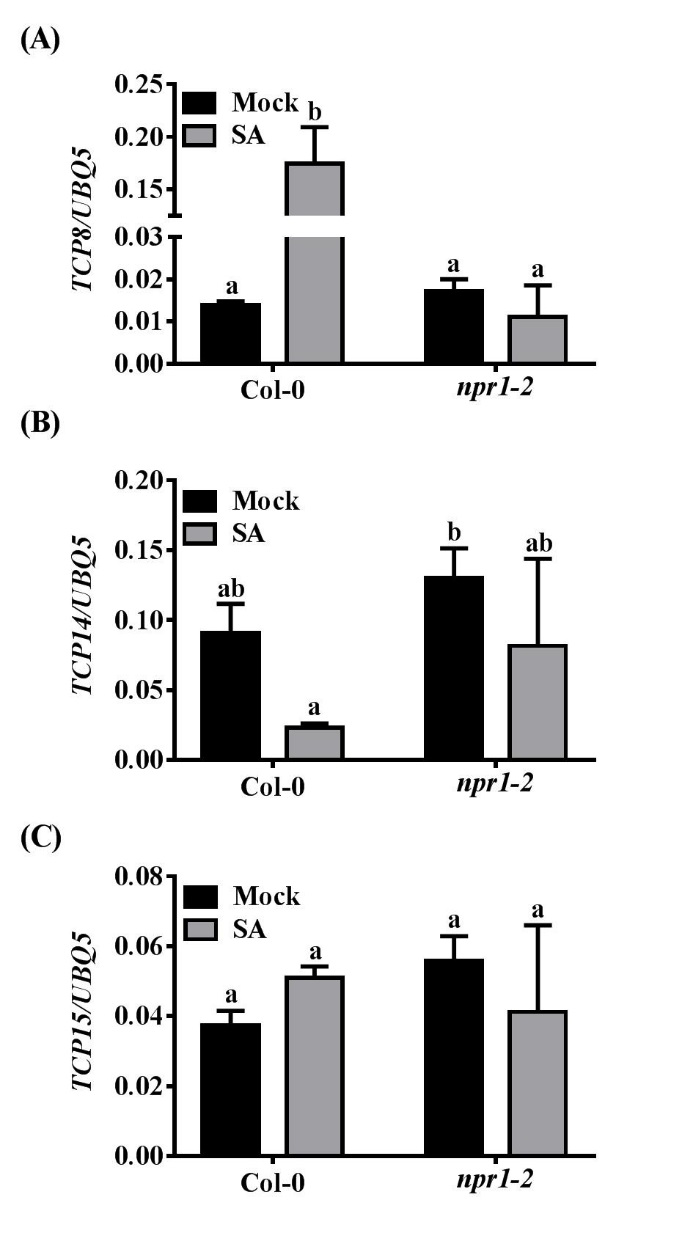


**Supplementary Figure 1.** SA-induced expression of *TCP8* requires *NPR1*.

Four-week-old plants were sprayed with water (Mock) or 0.5 mM SA (SA) for 24 hours. The mRNA levels of *TCP8* **(A)**, *TCP14* **(B),** and *TCP15* **(C)** in Col-0 and *npr1-2* were examined by RT-qPCR. Primers used in this study were described in (Wang et al., 2015). Relative mRNA levels were normalized to the *UBQ5* mRNA levels. Error bars represent SD of three biological repeats. Statistical analysis was studied by two-way ANOVA following multiple comparisons with turkey test (95% confidence interval) using GraphPad Prism 7. Different small letters above the bars means significant difference

**
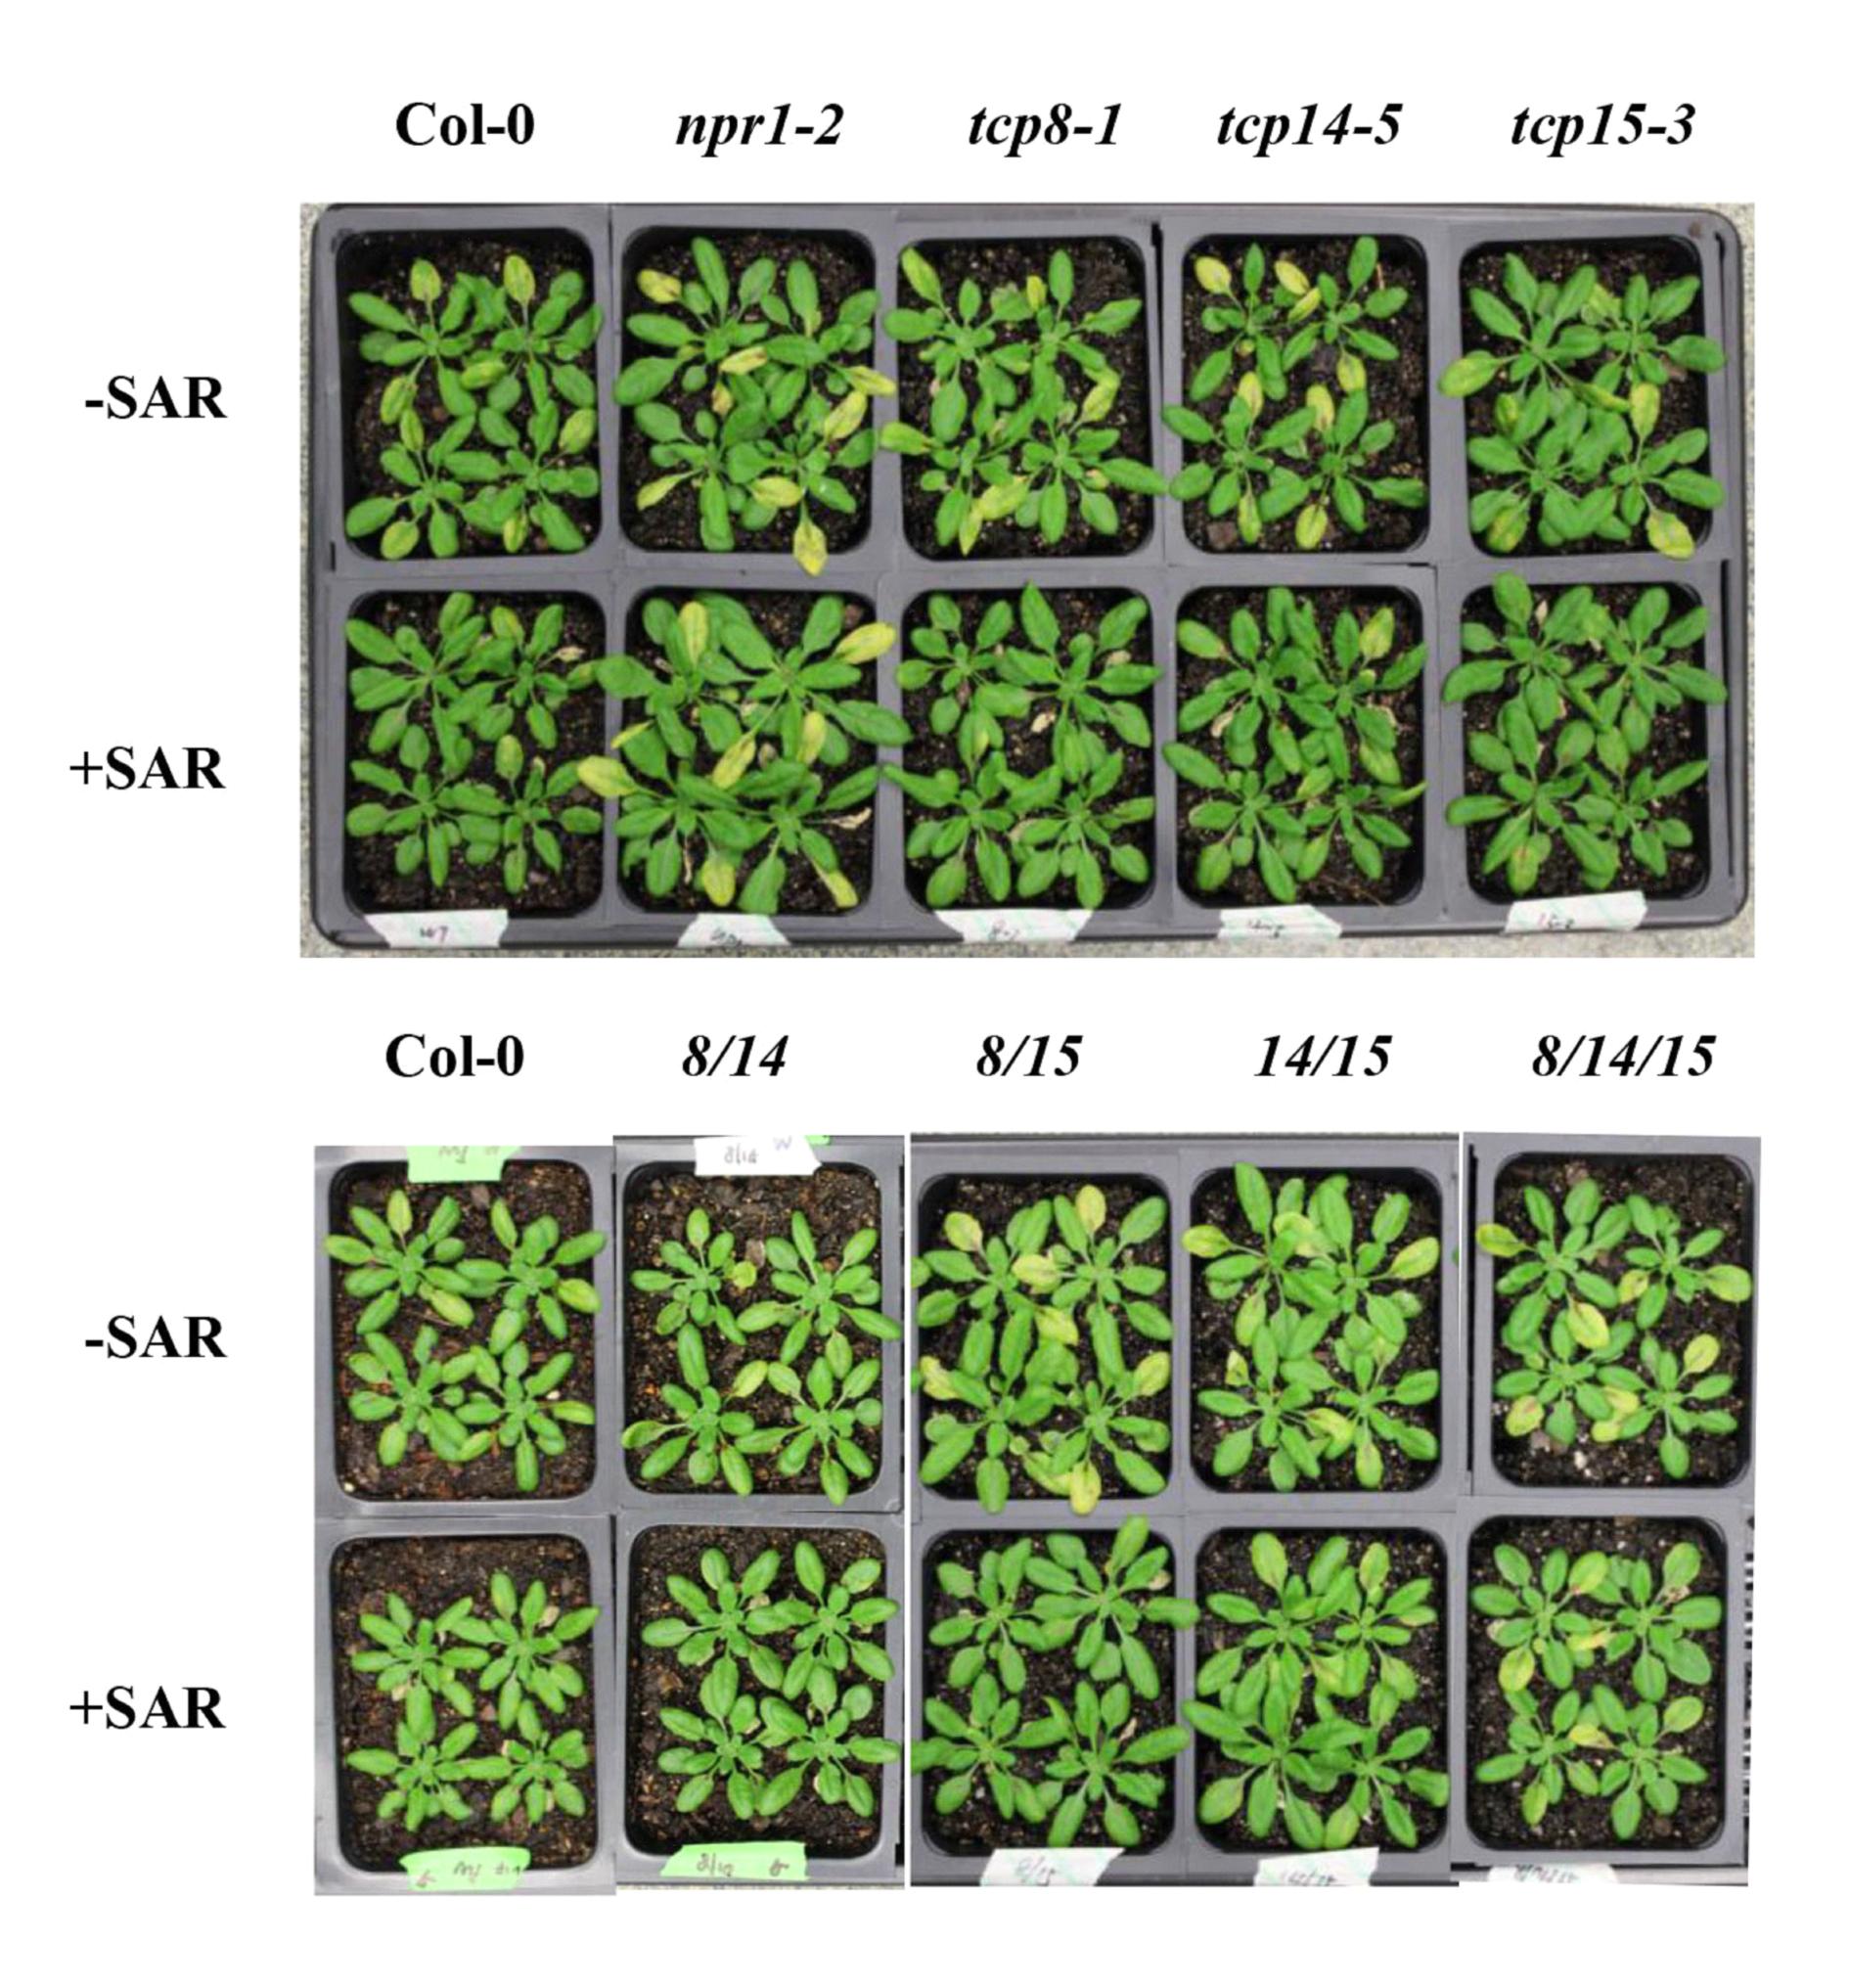
**

**Supplementary Figure 2.** The disease symptoms of plants subjected to SAR test.

Two lower leaves of three-week-old plants were infiltrated with 10 mM MgCl2 (-SAR) or *Psm* ES4326 with *avrRpt2* (OD600 = 0.02) (+SAR). Three days later, two upper leaves were infiltrated with *Psm* ES4326 (OD600 = 0.001). Photographs were taken three days post the second infection.

**
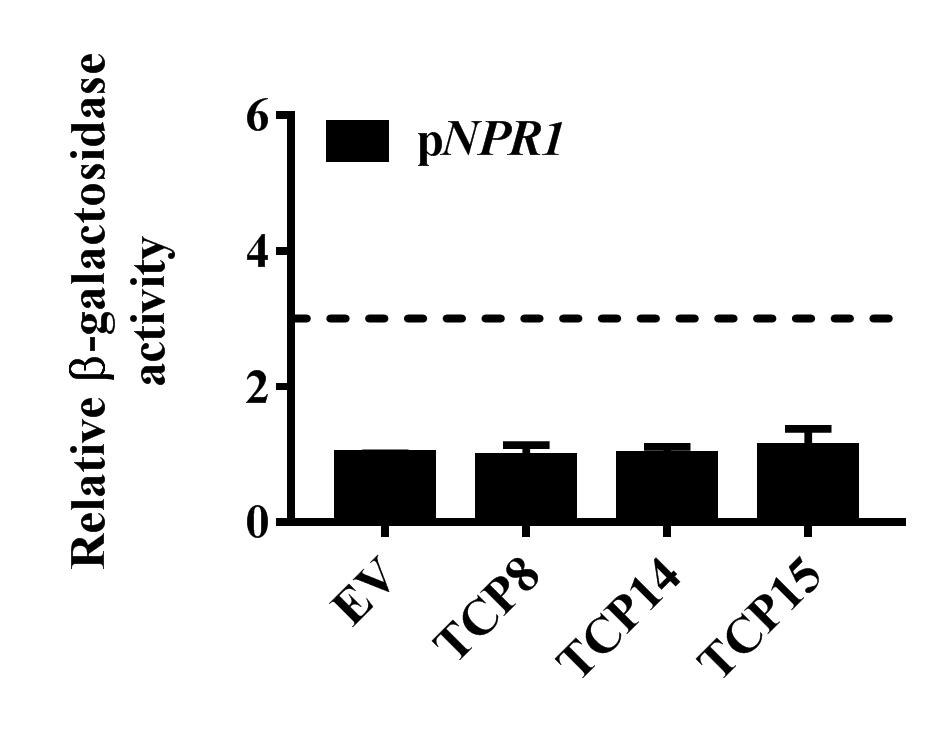
**

**Supplementary Figure 3.** TCP8, TCP14, and TCP15 did not bind to the *NPR1* promoter

The binding ability of TCP8, TCP14, and TCP15 to the *NPR1* promoter was studied by Y1H.
